# Supplementary material for: Vanadium doping of strontium germanate and their visible photocatalytic properties
Source: Royal Society of Chemistry journal article supplement (doi:10.1039/c4ra07324j), 2014-01-01
Supplement: c4ra07324j1.pdf [file c4ra07324j1.pdf]

# Vanadium doping of strontium germanate and their visible photocatalytic properties

L. Z. Pei<sup>a,\*</sup>, S. Wang<sup>a</sup>, N. Lin<sup>a</sup>, H. D. Liu<sup>a</sup> and Y. H. Guo<sup>b</sup>

<sup>a</sup> Key Lab of Materials Science and Processing of Anhui Province, School of Materials Science and Engineering, Anhui University of Technology, Ma'anshan, Anhui 243002, P. R. China

<sup>b</sup> Department of Materials Science, Fudan University, Shanghai 200433, P. R. China

Fig. S1 shows the UV-vis spectra of the MB solution after different irradiation times treated by strontium germanate nanowires in 20 ml MB solution. Strontium germanate nanowires, 20 mg;

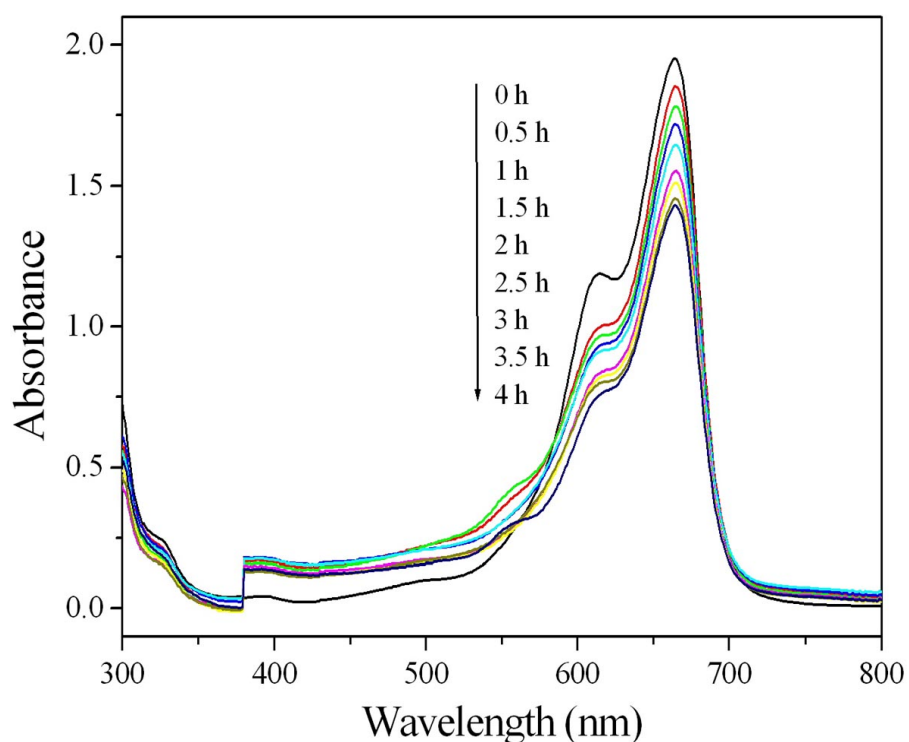

**Fig. S1.** UV-vis spectra of the MB solution after different irradiation times treated by strontium germanate nanowires in 20 ml MB solution. Strontium germanate nanowires, 20 mg; MB, 10 mgL<sup>-1</sup>

\* Corresponding author. Fax: +865552311570.  
E-mail addresses: lzpei@ahut.edu.cn, lzpei1977@163.com (L. Z. Pei).

MB, 10 mgL<sup>-1</sup>.

Fig. S2 shows the UV-vis spectra of the MB solution after different irradiation times treated by vanadium doped stronium germanate with V content of 1wt.% in 20 ml MB solution.

Vanadium doped stronium germanate, 20 mg; MB, 10 mgL<sup>-1</sup>.

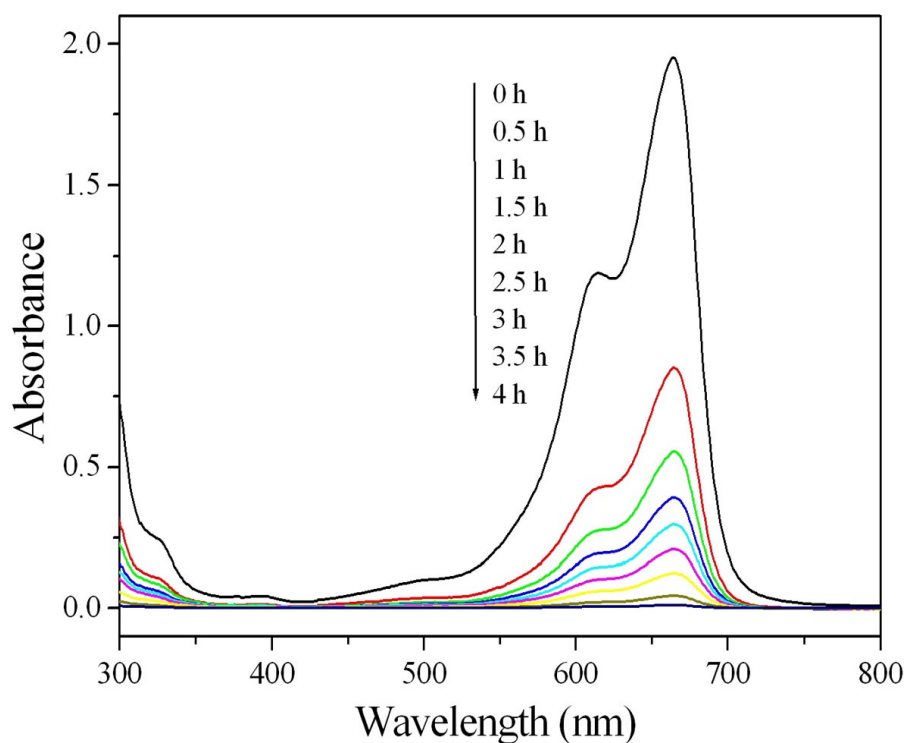

**Fig. S2.** UV-vis spectra of the MB solution after different irradiation times treated by vanadium doped stronium germanate with V content of 1wt.% in 20 ml MB solution. Vanadium doped stronium germanate, 20 mg; MB, 10 mgL<sup>-1</sup>.

Fig. S3 shows the UV-vis spectra of the MB solution after different irradiation times treated by vanadium doped stronium germanate with V content of 3wt.% in 20 ml MB solution.

Vanadium doped stronium germanate, 20 mg; MB, 10 mgL<sup>-1</sup>.

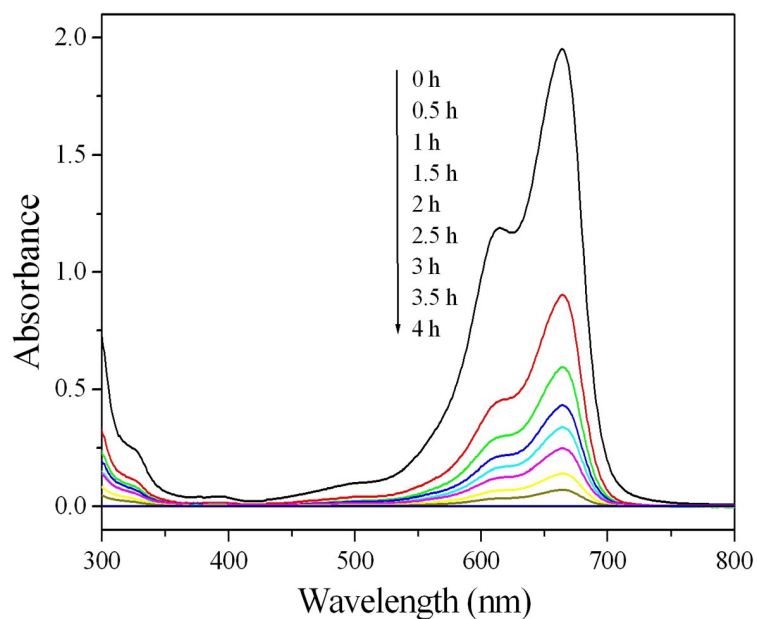

**Fig. S3.** UV-vis spectra of the MB solution after different irradiation times treated by vanadium doped strontium germanate with V content of 3wt.% in 20 ml MB solution. Vanadium doped strontium germanate, 20 mg; MB, 10 mgL<sup>-1</sup>.

Fig. S4 shows the UV-vis spectra of the MB solution after different irradiation times treated

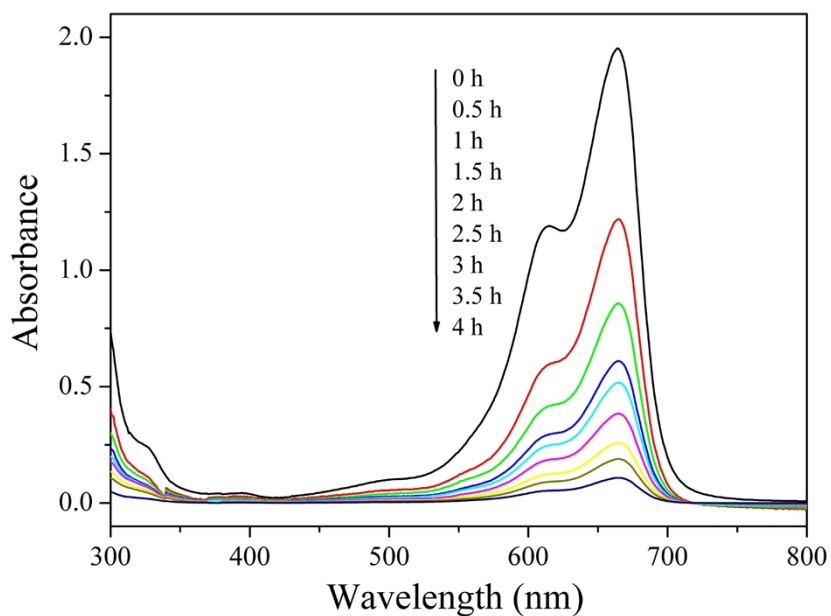

**Fig. S4.** UV-vis spectra of the MB solution after different irradiation times treated by vanadium doped strontium germanate with V content of 5wt.% in 20 ml MB solution. Vanadium doped strontium germanate, 20 mg; MB, 10 mgL<sup>-1</sup>.

by vanadium doped stronium germanate with V content of 5wt.% in 20 ml MB solution.

Vanadium doped stronium germanate, 20 mg; MB, 10 mgL<sup>-1</sup>.

Fig. S5 shows the UV-vis spectra of the MB solution after different irradiation times treated by vanadium doped stronium germanate with V content of 10wt.% in 20 ml MB solution.

Vanadium doped stronium germanate, 20 mg; MB, 10 mgL<sup>-1</sup>.

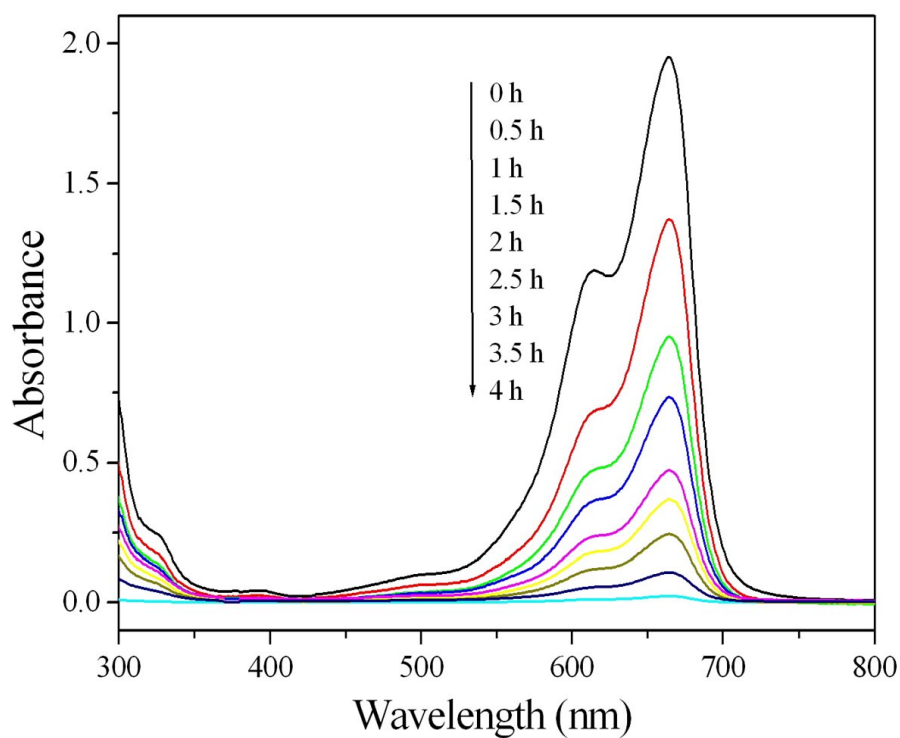

**Fig. S5.** UV-vis spectra of the MB solution after different irradiation times treated by vanadium doped stronium germanate with V content of 5wt.% in 20 ml MB solution. Vanadium doped stronium germanate, 20 mg; MB, 10 mgL<sup>-1</sup>.

Fig. S6 shows the UV-vis spectra of the MB solution treated using 1wt.% vanadium doped stronium germanate with different contents in 10 ml MB solution. Irradiation time, 4 h; MB, 10 mgL<sup>-1</sup>.

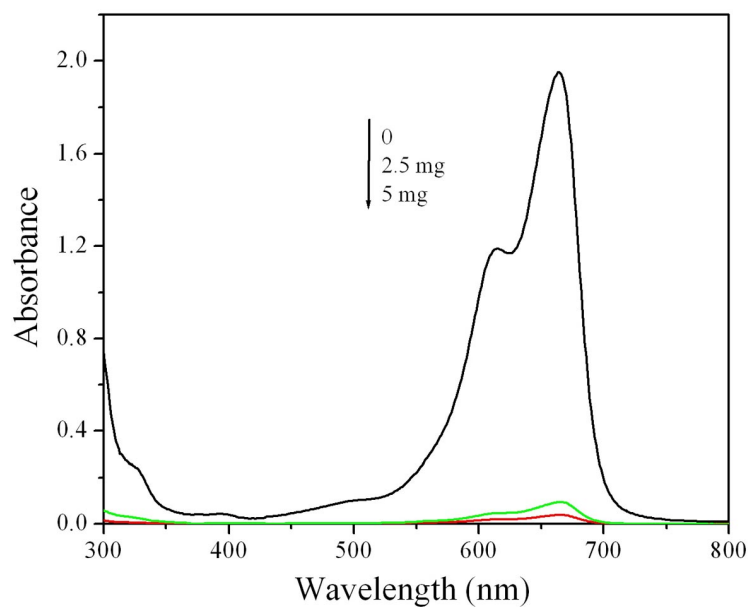

**Fig. S6.** UV-vis spectra of the MB solution treated using 1wt.% vanadium doped strontium germanate with different contents in 10 ml MB solution. Irradiation time, 4 h; MB, 10 mgL<sup>-1</sup>.

Fig. S7 shows the UV-vis spectra of the MB solution treated using 3wt.% vanadium doped strontium germanate with different contents in 10 ml MB solution. Irradiation time, 4 h; MB, 10 mgL<sup>-1</sup>.

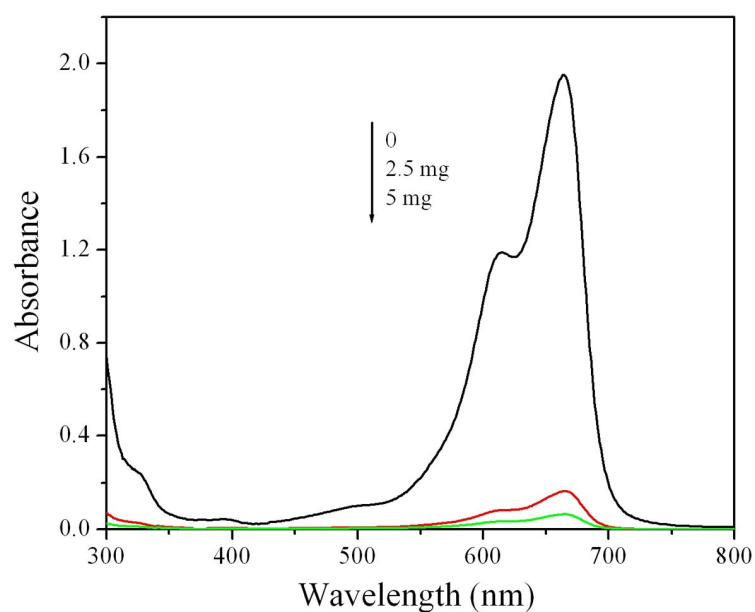

**Fig. S7.** UV-vis spectra of the MB solution treated using 3wt.% vanadium doped strontium germanate with different contents in 10 ml MB solution. Irradiation time, 4 h; MB, 10 mgL<sup>-1</sup>.

Fig. S8 shows the UV-vis spectra of the MB solution treated using 5wt.% vanadium doped strontium germanate with different contents in 10 ml MB solution. Irradiation time, 4 h; MB, 10 mgL<sup>-1</sup>.

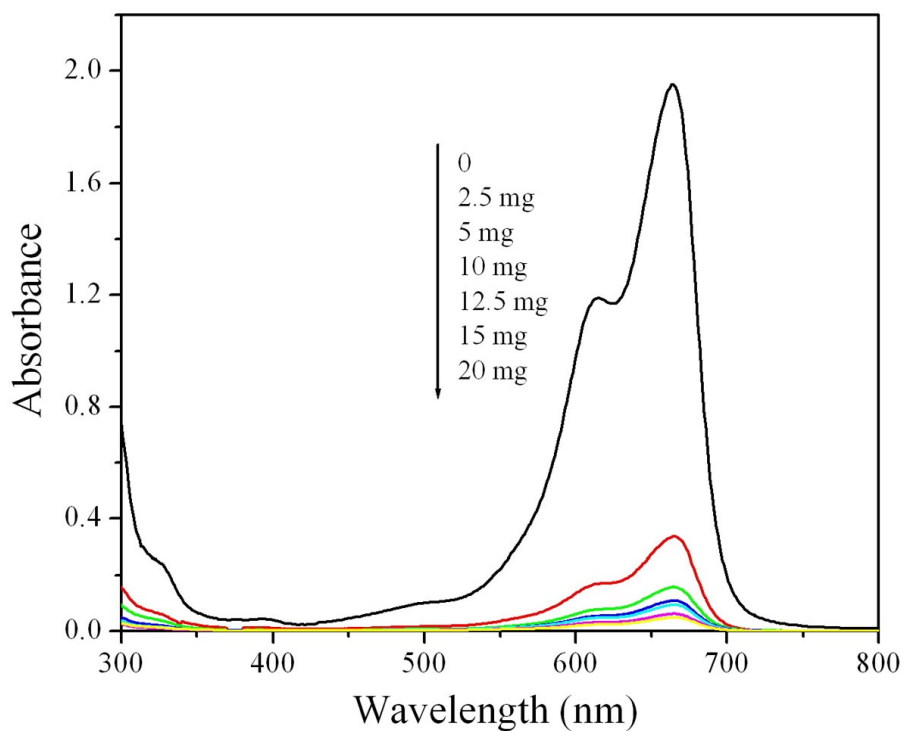

**Fig. S8.** UV-vis spectra of the MB solution treated using 5wt.% vanadium doped strontium germanate with different contents in 10 ml MB solution. Irradiation time, 4 h; MB, 10 mgL<sup>-1</sup>.

Fig. S9 shows the UV-vis spectra of the MB solution treated using 10wt.% vanadium doped strontium germanate with different contents in 10 ml MB solution. Irradiation time, 4 h; MB, 10 mgL<sup>-1</sup>.

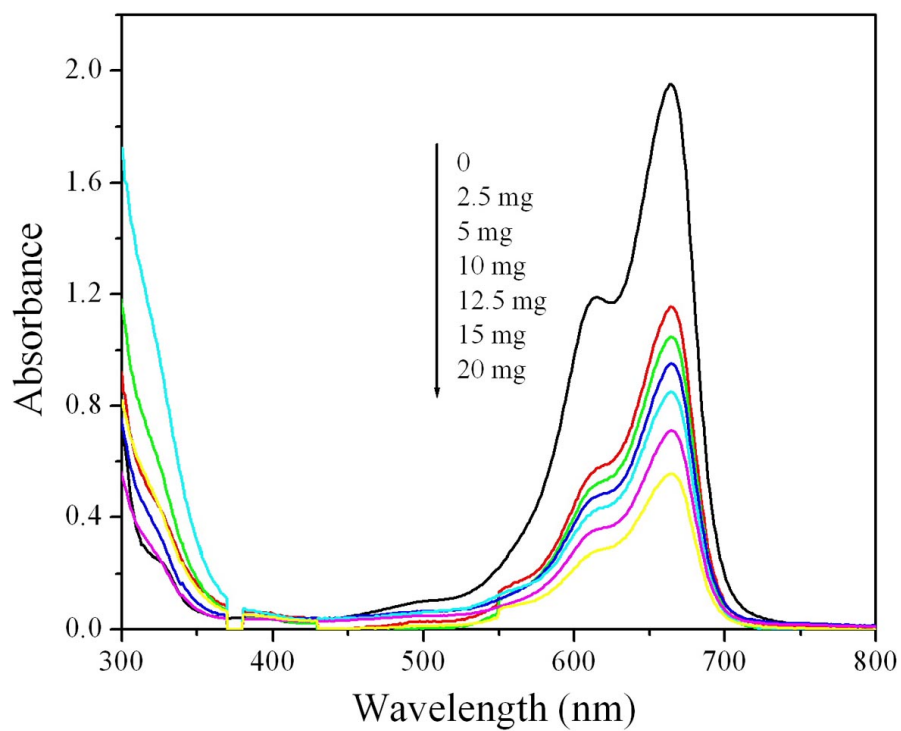

**Fig. S9.** UV-vis spectra of the MB solution treated using 10wt.% vanadium doped strontium germanate with different contents in 10 ml MB solution. Irradiation time, 4 h; MB, 10 mgL<sup>-1</sup>.
